# Supplementary material for: QTL Mapping for Fiber Quality Based on Introgression Lines Population from G. hirsutum × G. tomentosum
Source: MDPI journal article supplement (doi:10.3390/agriculture13030579), 2023-02-27
Supplement: s1 [file s1]

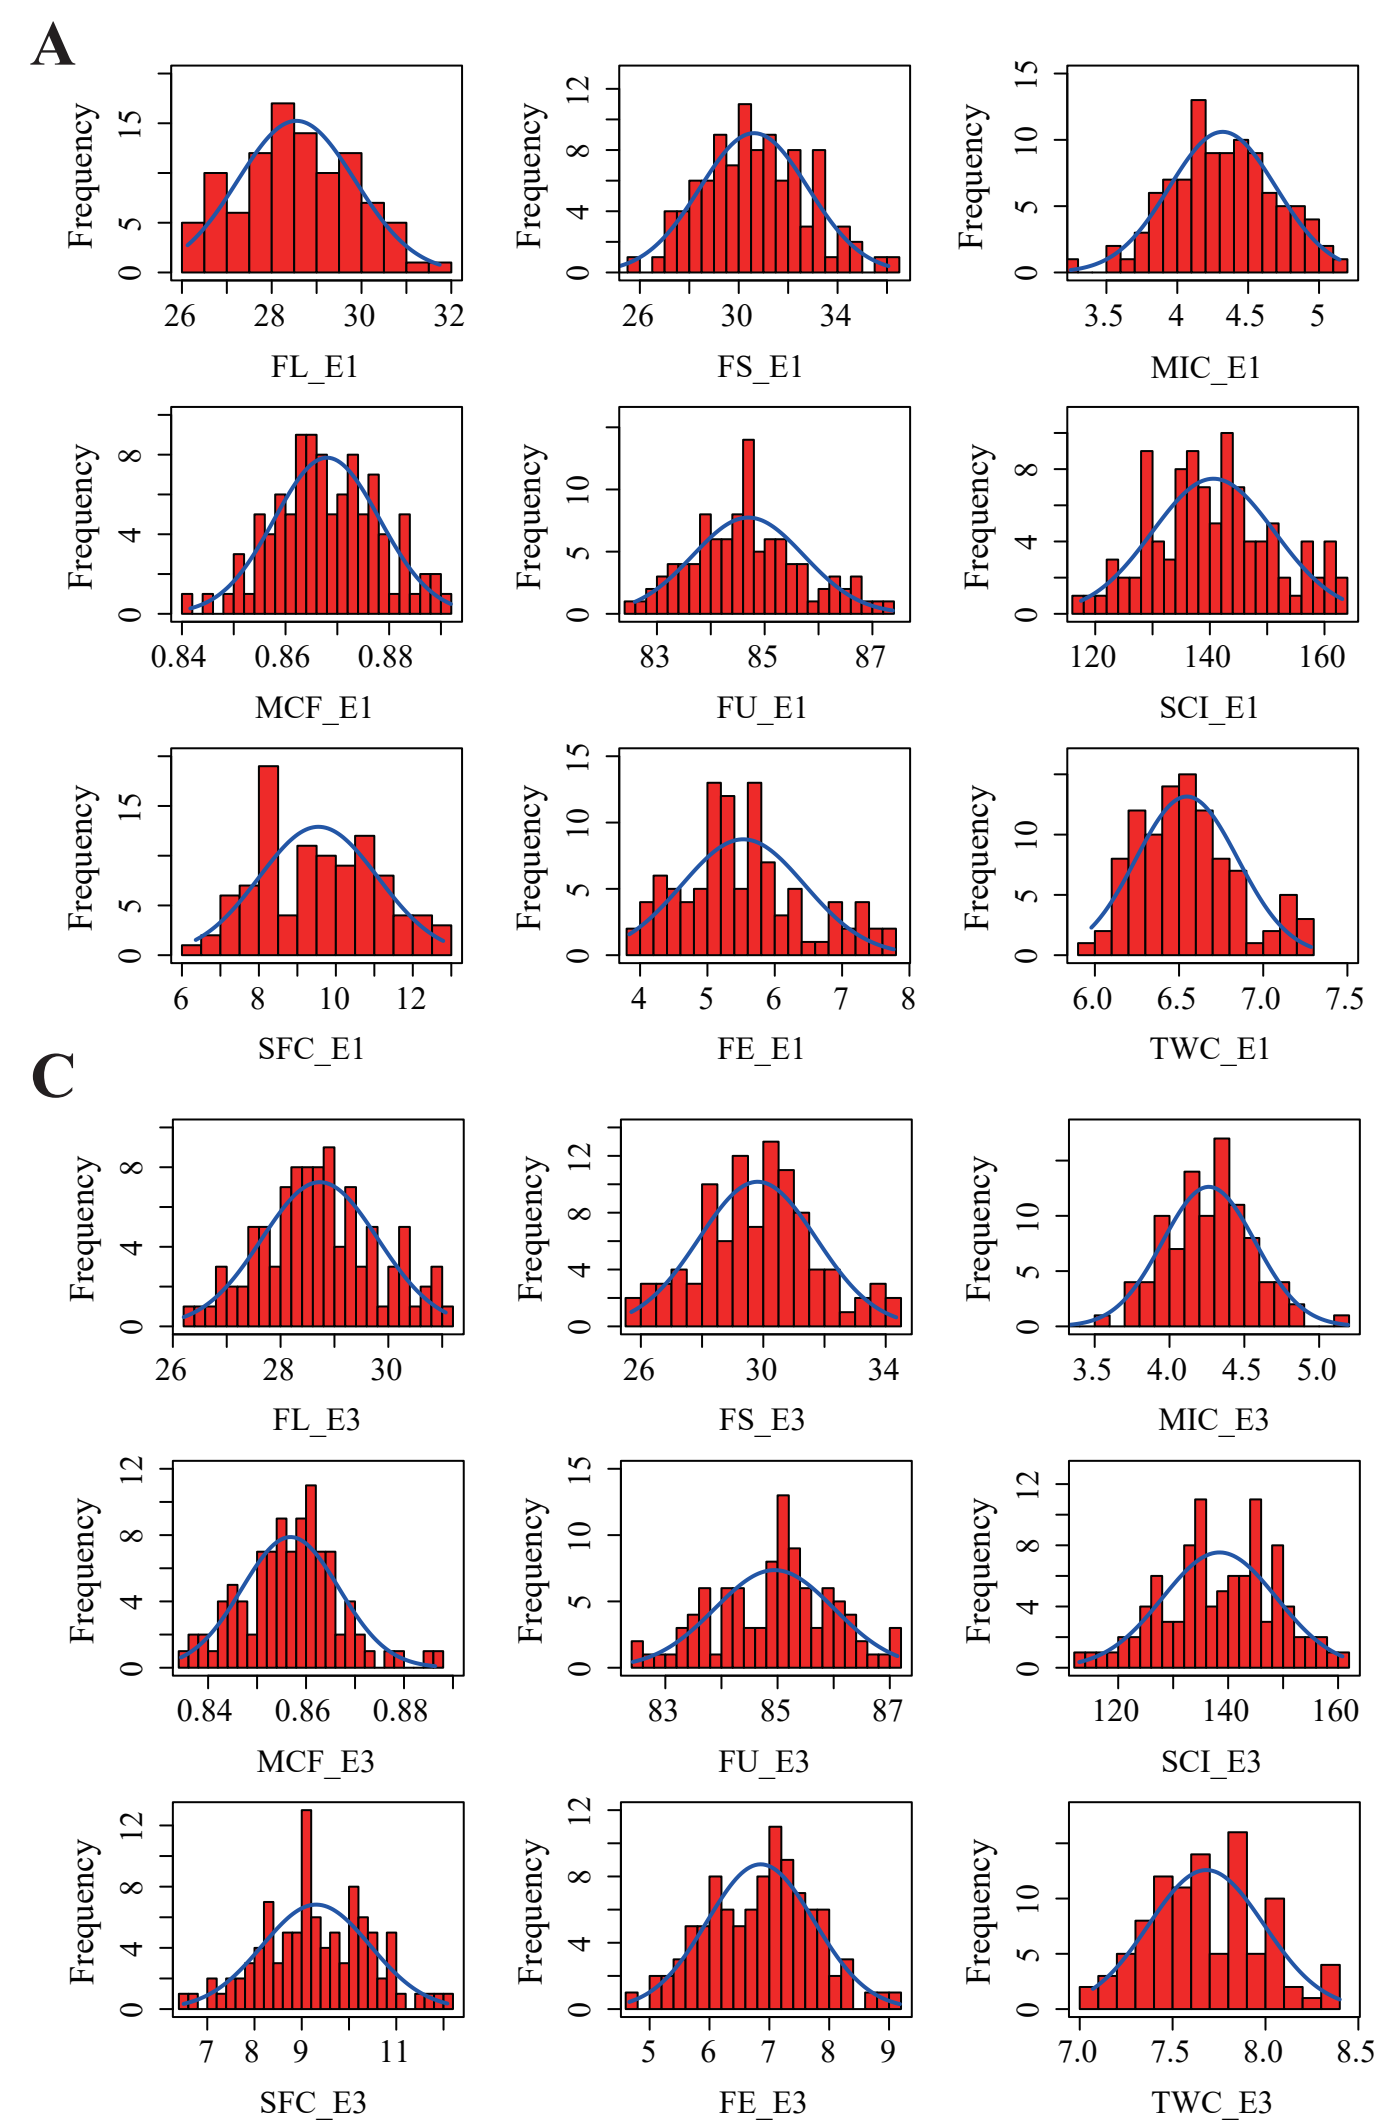

**Figure S2.** Phenotypic distribution of nine fiber quality traits in the ILs across three environments. (A-C) are the phenotype distributions in the E1 (Manasi in 2018), E2 (Korla in 2018) and E3 (Manasi in 2019) environments, respectively. FL: Fiber length; FS: Fiber strength; MCF: Maturity of cotton fiber; MIC: Micronaire value; SFC: Short fiber content; FU: Fiber uniformity; FE: Fiber elongation; SCI: Spinning consistency index; TWC: The water content.
