# Supplementary material for: QTL Mapping for Fiber Quality Based on Introgression Lines Population from G. hirsutum × G. tomentosum
Source: MDPI journal article supplement (doi:10.3390/agriculture13030579), 2023-02-27
Supplement: s1 [file s1]

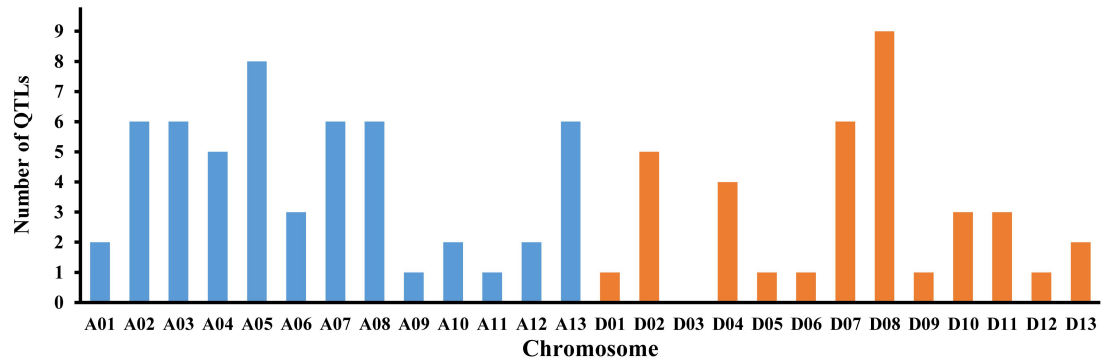

**Figure S6.** Distribution of QTLs of Fiber quality Trait QTL on chromosomes. X-axis represents chromosome, Y-axis represents number of QTLs on chromosome.
