# Supplementary material for: QTL Mapping for Fiber Quality Based on Introgression Lines Population from G. hirsutum × G. tomentosum
Source: MDPI journal article supplement (doi:10.3390/agriculture13030579), 2023-02-27
Supplement: s1 [file s1]

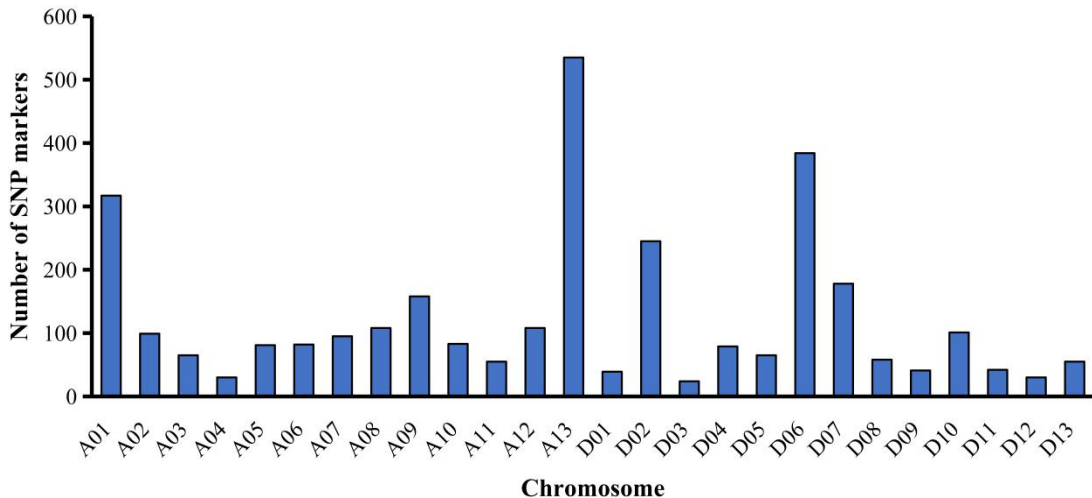

**Figure S3.** Number of SNP markers in chromosomes. X-axis indicates the Chromosomes and Y-axis indicates the number of SNP markers.
