# Supplementary figures and images for: QTL Mapping for Fiber Quality Based on Introgression Lines Population from G. hirsutum × G. tomentosum
Source: MDPI journal article supplement (doi:10.3390/agriculture13030579), 2023-02-27

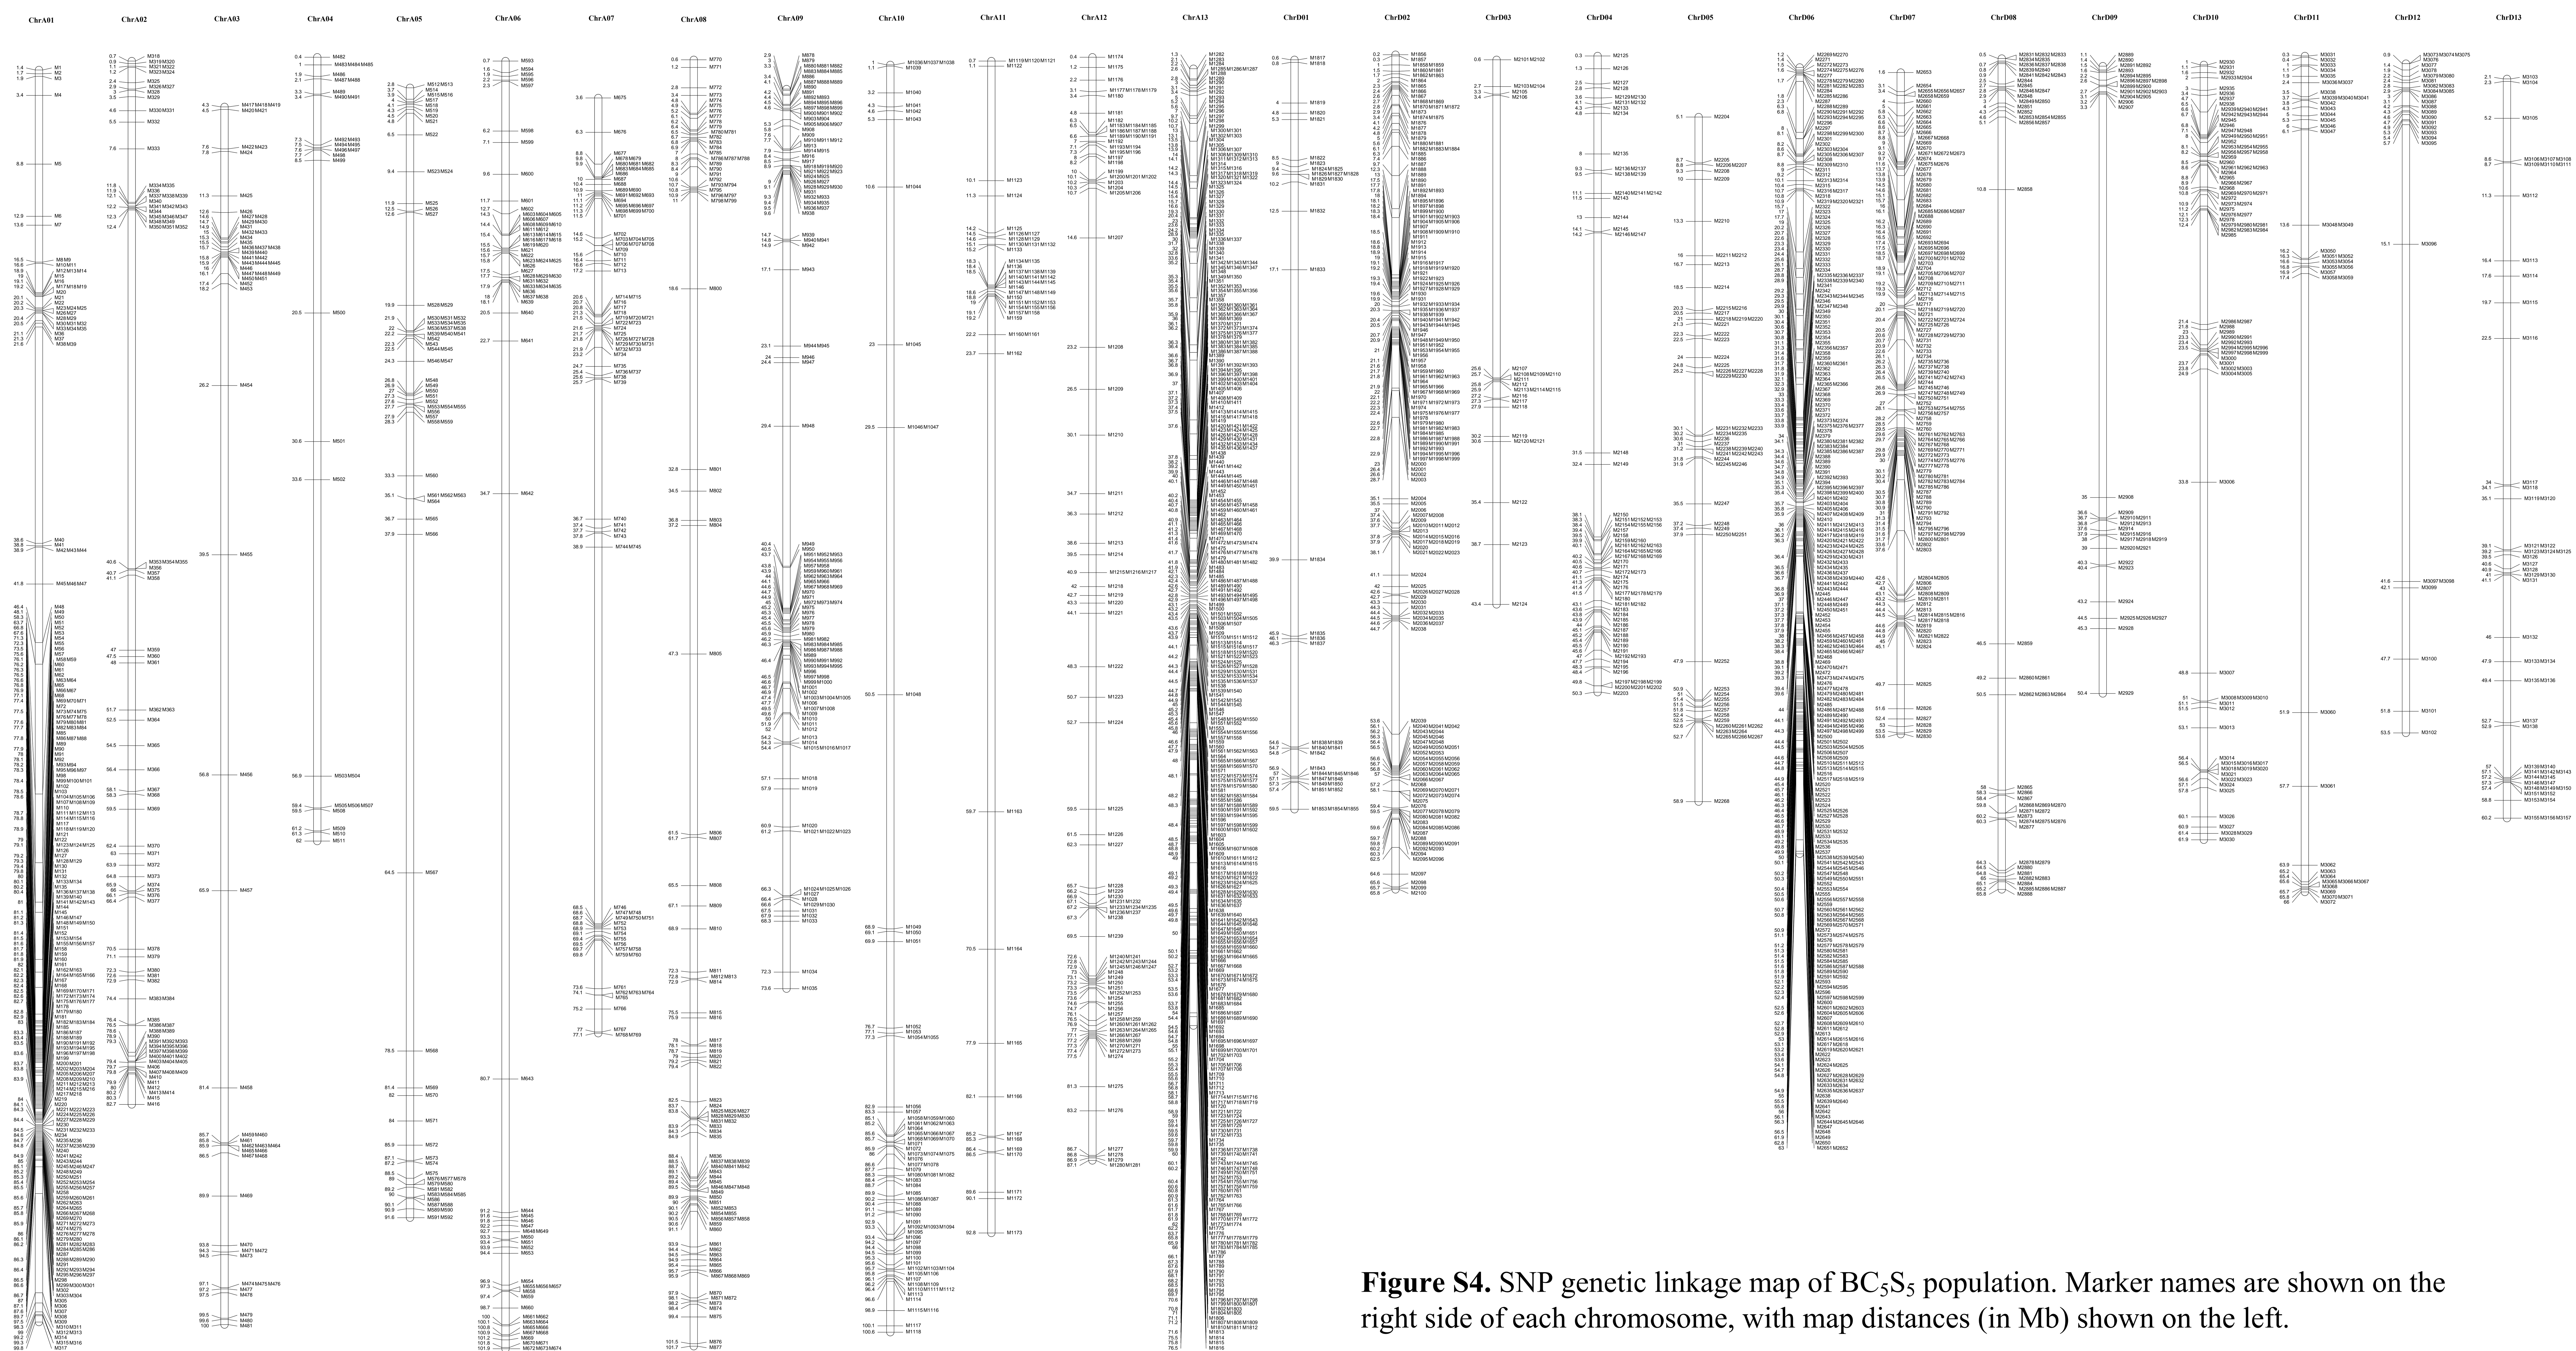

Supplement: s1 [file s1]
